# Supplementary material
Source: PubMed Central journal article supplement (PMC7963722)
Supplement: 17-00312.pdf [file 17-00312.pdf]

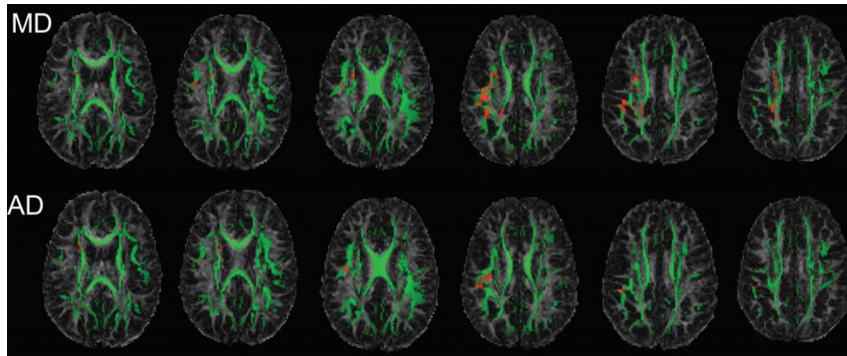

**ON-LINE FIGURE.** Several tracts showed sex effects (in *orange* color) in white matter development as reflected by differences ( $P < .05$ , corrected) in DTI parameter values (MD, mean diffusivity; AD, axial diffusivity) between sexes for the 8-year-old children: On the other hand, there were no sex effects in white matter development for the 2-week-old term infants. No tracts or voxels showed any difference ( $P < .05$ , corrected) in any DTI parameters between sexes for these infants.
